# Supplementary material for: Supramolecular organogels based on perylenetetracarboxylic diimide dimer or hexamer
Source: Royal Society of Chemistry journal article supplement (doi:10.1039/c1sm05435j), 2011-01-01
Supplement: c1sm05435j.pdf [file c1sm05435j.pdf]

## **Electronic Supplementary Information**

### **Supramolecular Organogels Based on Perylenetetracarboxylic Diimide Dimer or Hexamer**

Lin Xue, Haixia Wu, Yan Shi, Heyuan Liu, Yanli Chen\* and Xiyu Li\*

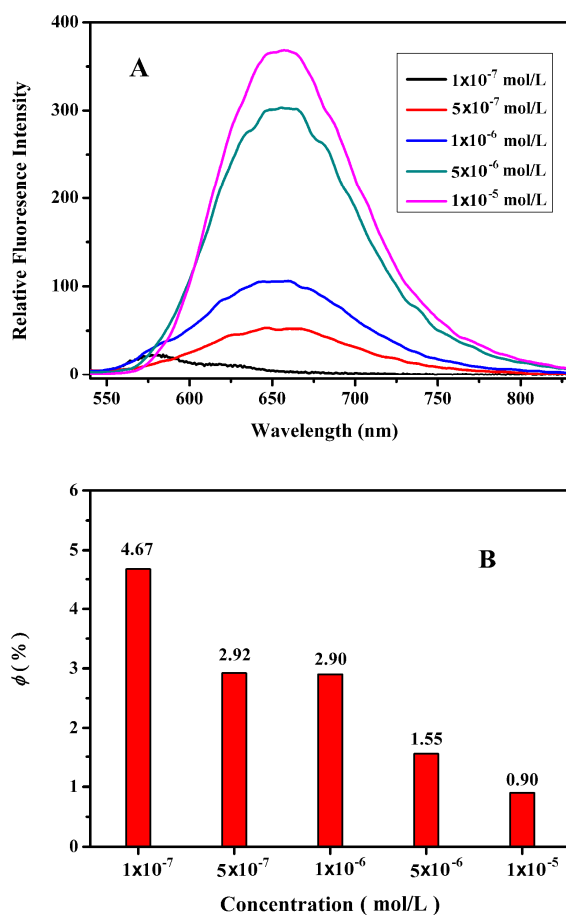

**Fig. S1.** The fluorescence spectra (A) and fluorescence quantum yields (B) of hexamer **2** in CHCl<sub>3</sub> at different concentrations.

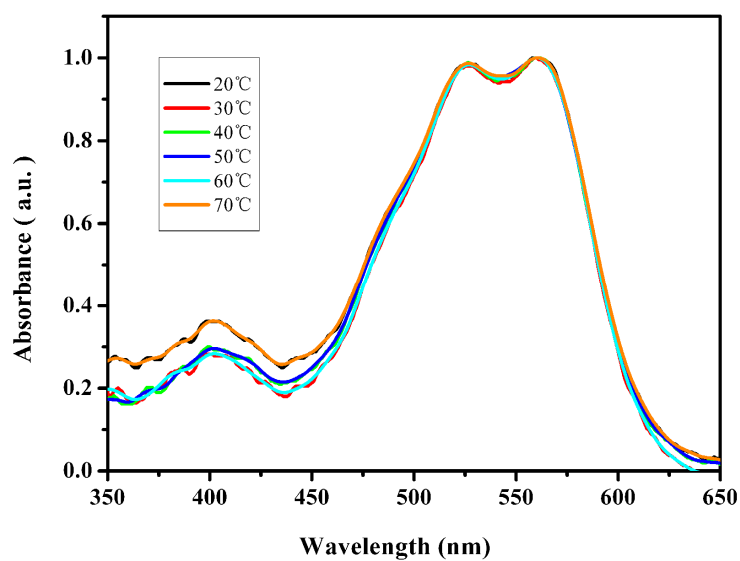

**Fig. S2.** The normalized absorption spectra of dimer **1** in MCH ( $5 \times 10^{-6} \text{ mol} \cdot \text{L}^{-1}$ ) at different temperature.

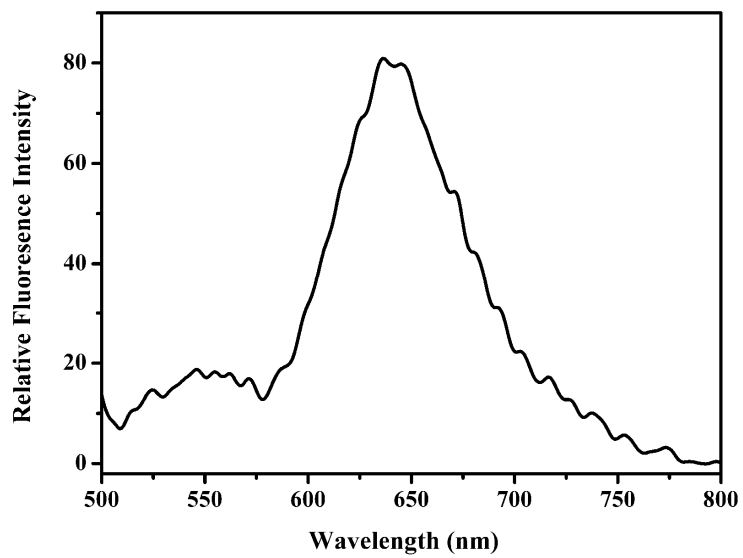

**Fig. S3.** The fluorescence spectrum of dimer 1 in MCH ( $5 \times 10^{-8} \text{ mol} \cdot \text{L}^{-1}$ ).
